# Supplementary material for: Development of Sesamol Carbamate-L-Phenylalanine Prodrug Targeting L-Type Amino Acid Transporter1 (LAT1) as a Potential Antiproliferative Agent against Melanoma
Source: MDPI journal article supplement (doi:10.3390/ijms23158446), 2022-07-30
Supplement: s1 [file s1]

## Supplementary Material

# Development of sesamol carbamate-L-phenylalanine prodrug targeting L-type amino acid transporter1 (LAT1) as a potential antiproliferative agent against melanoma

Tarapong Srisongkram<sup>1,2</sup>, Katayun Bahrami<sup>3</sup>, Juulia Järvinen<sup>3</sup>, Juri Timonen<sup>3</sup>, Jarkko Rautio<sup>3,\*</sup>, Natthida Weerapreeyakul<sup>1,2,\*</sup>

- <sup>1</sup> Division of Pharmaceutical Chemistry, Faculty of Pharmaceutical Sciences, Khon Kaen University, Khon Kaen, 40002, Thailand; tarasri@kku.ac.th (T.S.); natthida@kku.ac.th (N.W.)
- <sup>2</sup> Research Institute for Human High Performance and Health Promotion, Khon Kaen University, Khon Kaen, 40002, Thailand; tarasri@kku.ac.th (T.S.); natthida@kku.ac.th (N.W.)
- <sup>3</sup> School of Pharmacy, University of Eastern Finland, Kuopio 70211, Finland; katayun.bahrami@uef.fi (K.B.); juulia.jarvinen@uef.fi (J.J.); juri.timonen@uef.fi (J.T.); jarkko.rautio@uef.fi (J.R.)
- \* Correspondence: natthida@kku.ac.th; jarkko.rautio@uef.fi

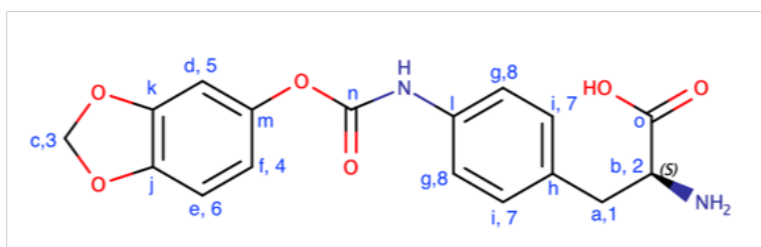

**Figure S1.** Sesamol prodrug chemical structure.

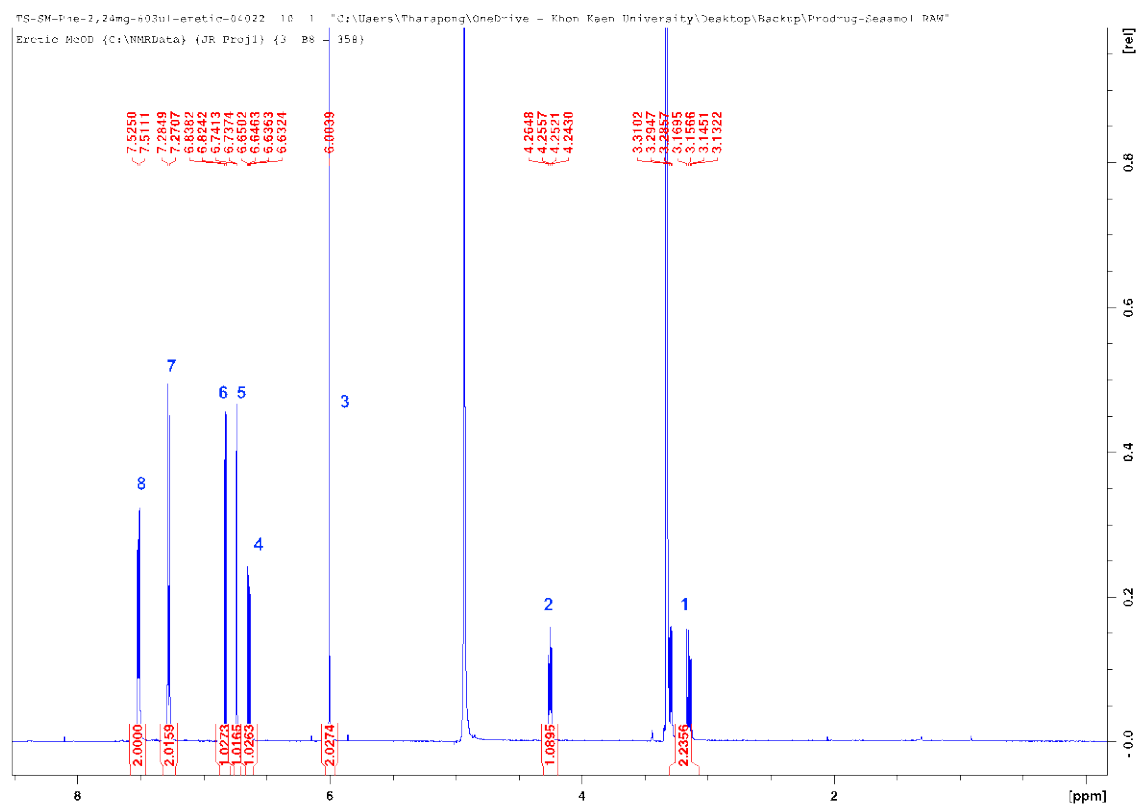

**Figure S2.**

Proton ( $^1\text{H}$ ) nuclear magnetic spectra (NMR) of sesamol prodrug in methanol-d solvent. The number **1-8** proton positions from the chemical structure from Figure S1

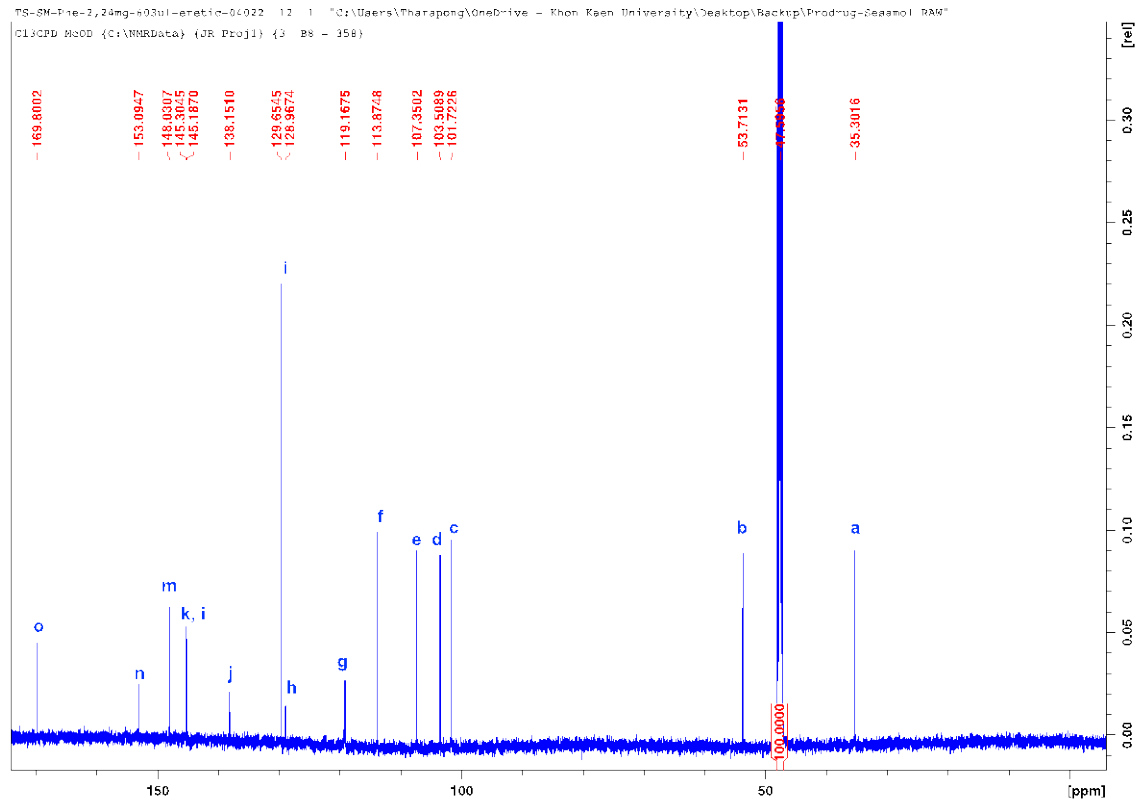

**Figure S3.** Carbon ( $^{13}\text{C}$ -NMR) of sesamol prodrug chemical structure. The alphabet **a-o** are carbon positions from the chemical structure from Figure S1.

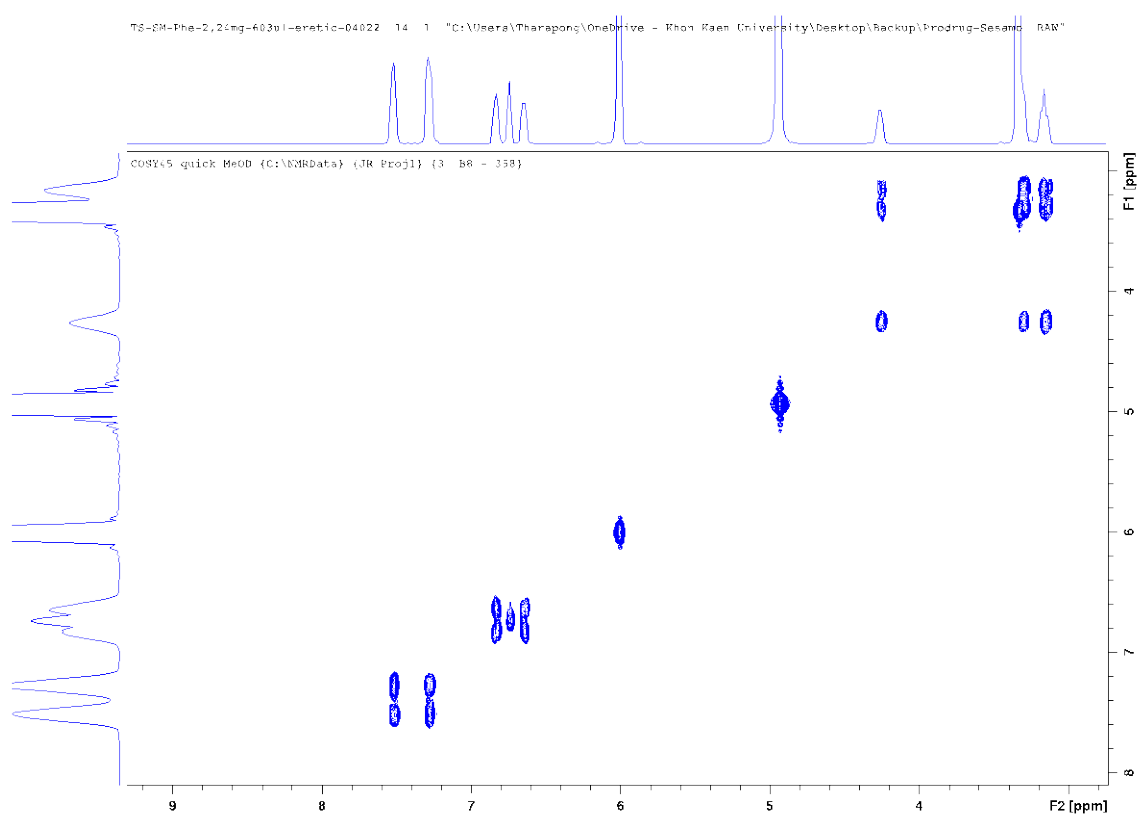

**Figure S4.**  $^1\text{H}$ - $^1\text{H}$  Correlated spectroscopy (COSY) NMR of sesamol prodrug.

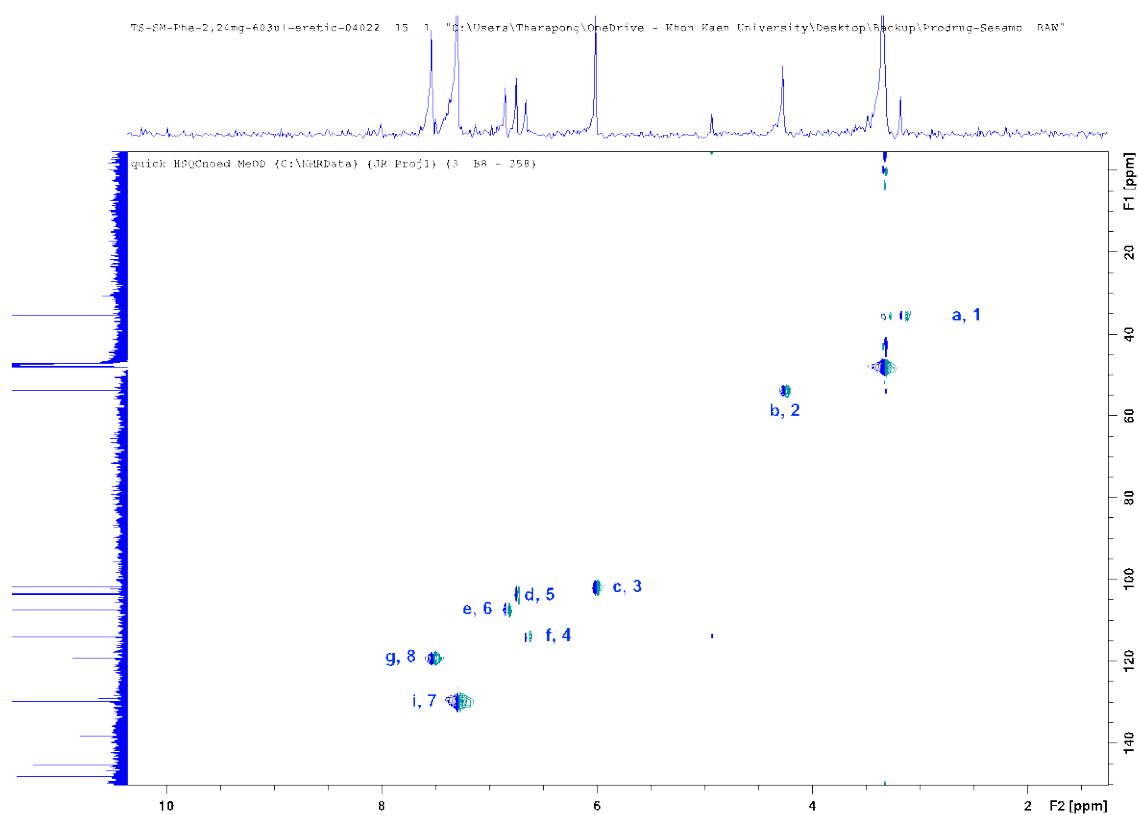

**Figure 5S**

$^1\text{H}$ - $^{13}\text{C}$  Heteronuclear single quantum coherence (HSQC) NMR of sesamol prodrug. The number and alphabet are related to the proton position and carbon position from the chemical structure from Figure S1.

#10335 AV: 10 IT: 0.411 ST: 0.96 uS: 2 CS: 1 AMW: 344.95 NL: 1.08E6  
F: ITMS + c ESI Z ms [140.00-600.00]

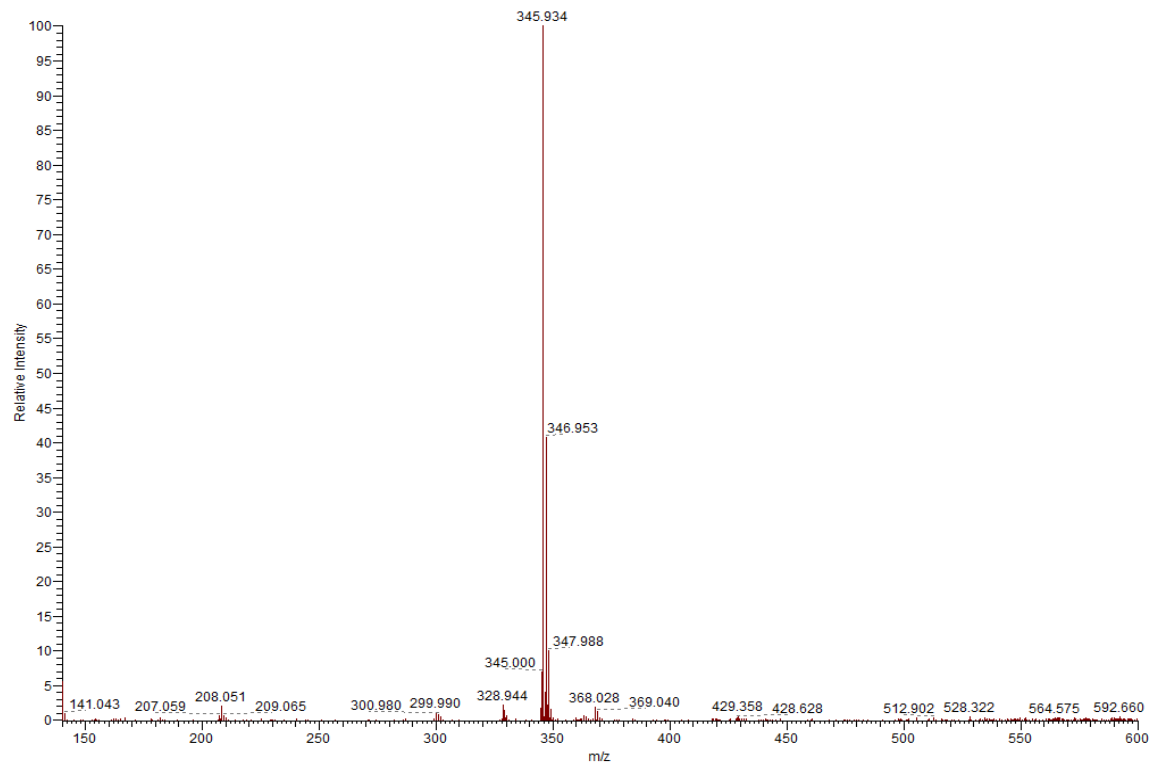

**Figure 6S.**

ESI-MS-positive mode of sesamol prodrug. The base m/z peak is 345.934 m/z. The actual molecular weight of sesamol prodrug is 344.95.
